# Supplementary material for: Engineering microstructured porous films for multiple applications via mussel-inspired surface coating
Source: Royal Society of Chemistry journal article supplement (doi:10.1039/c3ra44812f), 2013-01-01
Supplement: c3ra44812f.pdf [file c3ra44812f.pdf]

## Supplementary Information

Engineering microstructured porous films for multiple applications *via*  
mussel-inspired surface coating

Hongmin Ma, Picheng Gao, Yong Zhang, Dawei Fan, Guobao Li, Bin Du, and Qin Wei\*

*Key Laboratory of Chemical Sensing & Analysis in Universities of Shandong, School of Chemistry and Chemical  
Engineering, University of Jinan, Jinan 250022, China*

\*Corresponding author. Tel.: +86 531 8276 7872. E-mail address: sdjndxwq@163.com (Q. Wei).

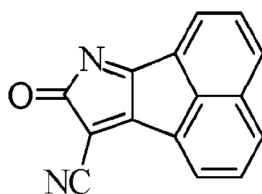

Scheme S1. The molecular structure of the fluorescence probe used to label cysteine.

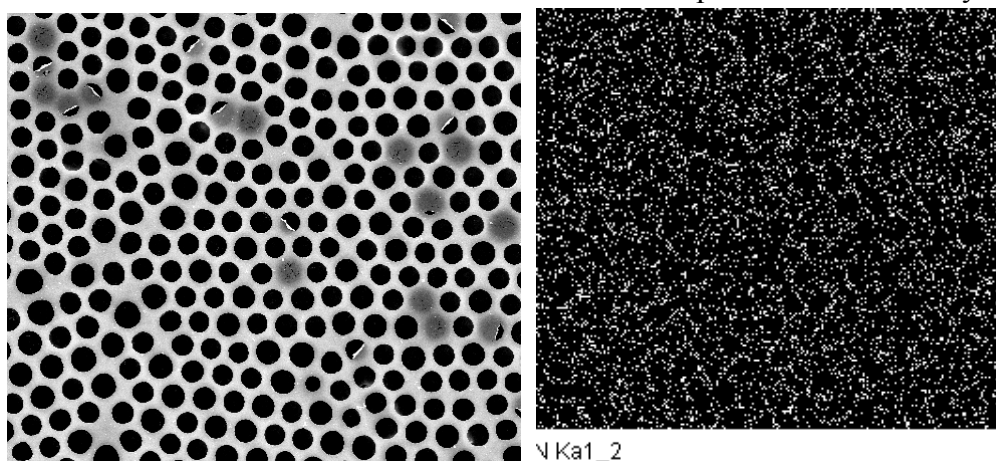

Fig. S1. Energy-dispersive X-ray spectroscopy (EDS) analysis of the polydopamine coated honeycomb film.

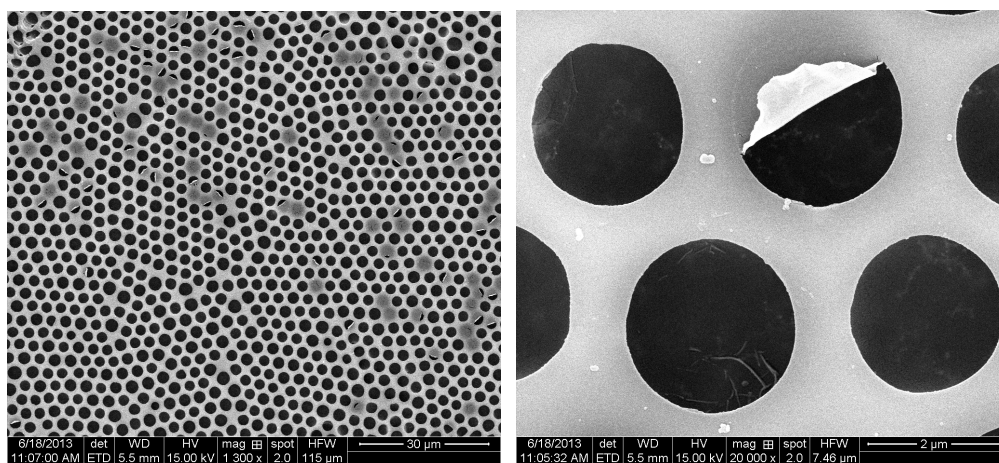

Fig. S2. SEM images of the honeycomb films after the polydopamine coating.

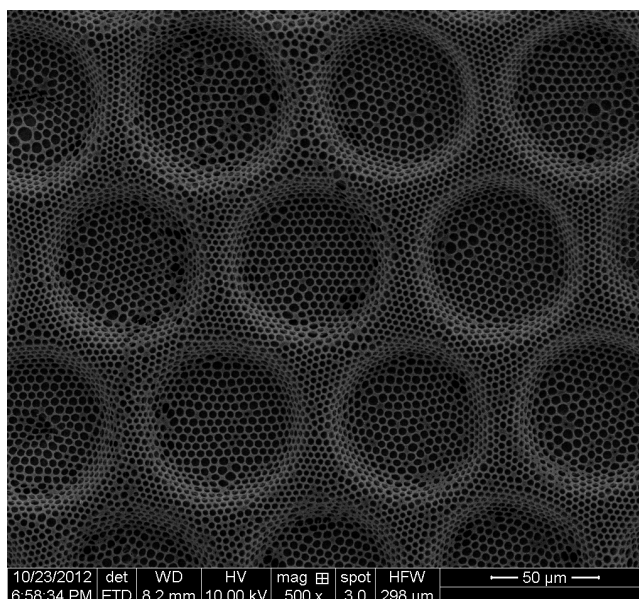

Fig. S3. SEM image of the honeycomb film formed on a TEM grid.

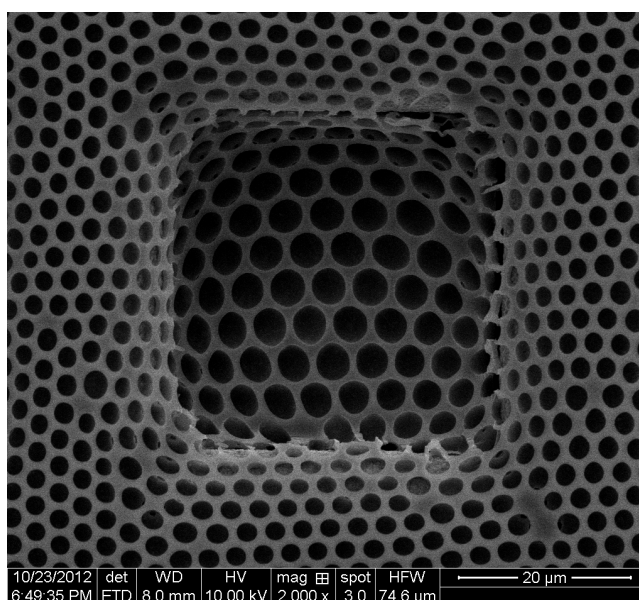

Fig. S4. SEM image of the honeycomb film formed on a TEM grid.

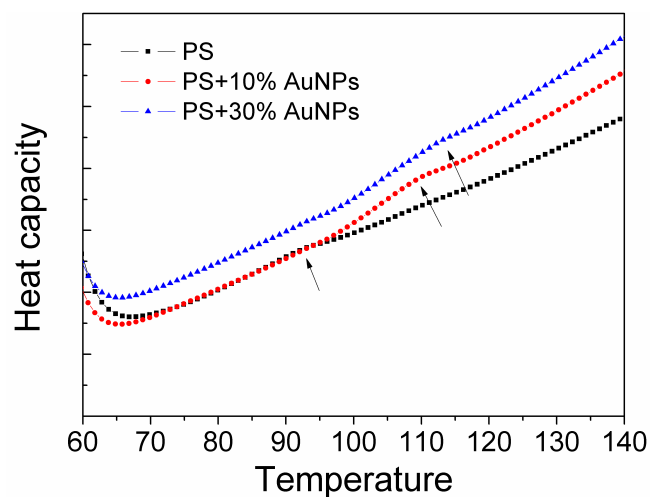

Fig. S5. DSC measurements of thin films prepared from PS and nanocomposites.

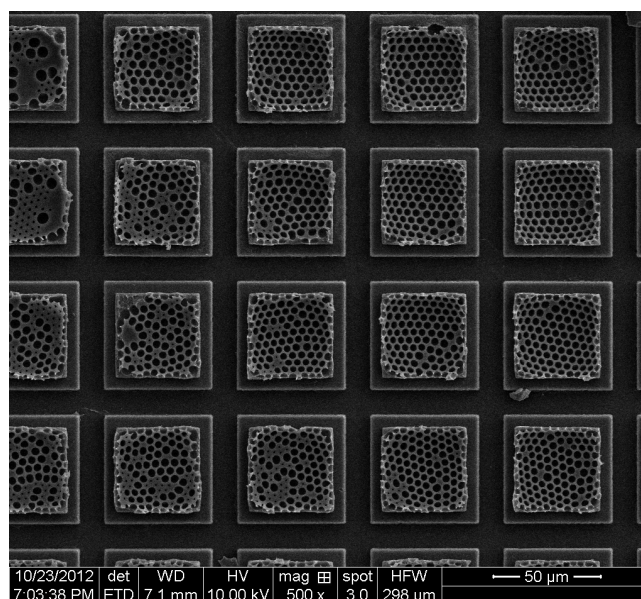

Fig. S6. SEM image of the micropatterned honeycomb film.

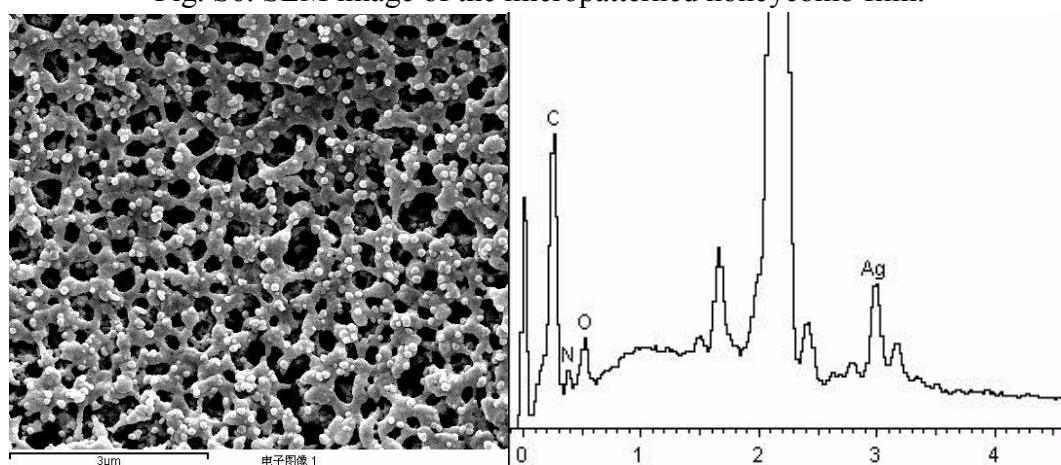

Fig. S7. EDS analysis of the AgNPs decorated microfiltration membrane.

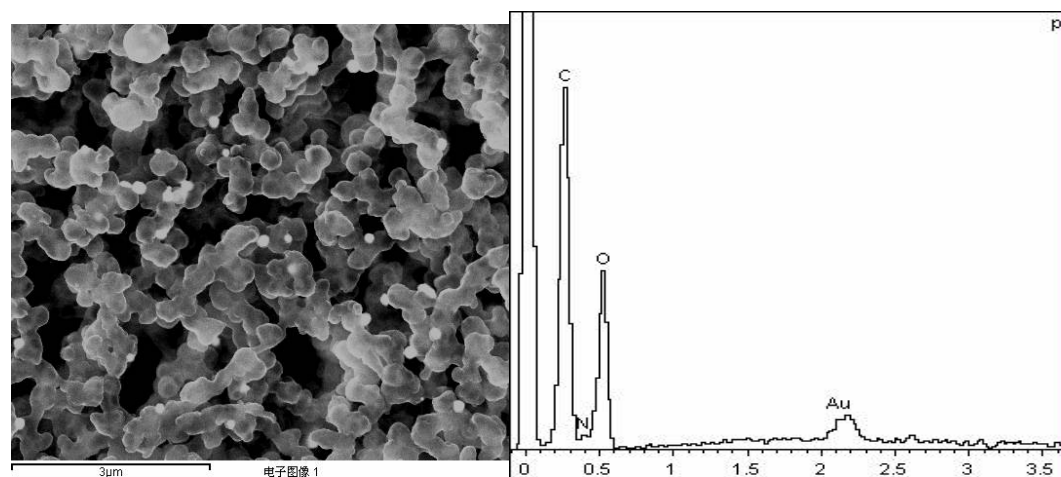

Fig. S8. EDS analysis of the AuNPs decorated microfiltration membrane.

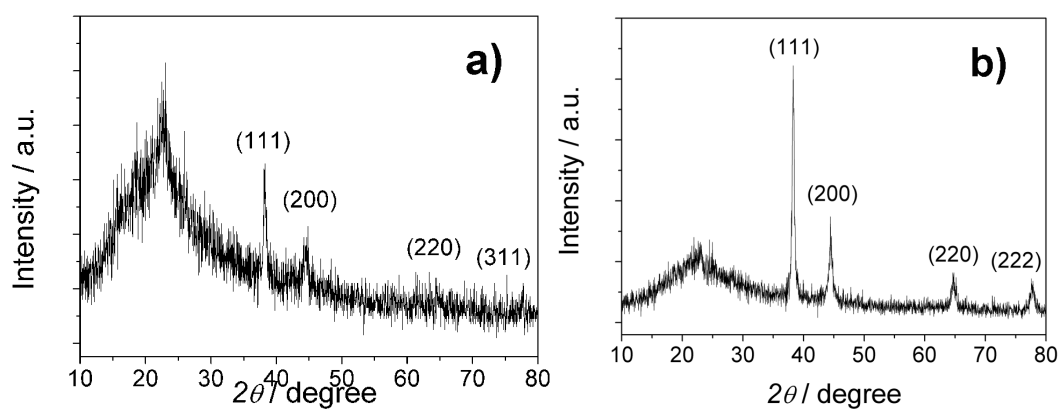

Fig. S9. XRD patterns of AgNPs (a) and AuNPs (b) decorated on the microfiltration membrane.
